# Supplementary material for: Iron Supplementation Eliminates Antagonistic Interactions Between Root-Associated Bacteria
Source: PubMed Central journal article supplement (PMC7387576; doi:10.3389/fmicb.2020.01742), 2020-07-22

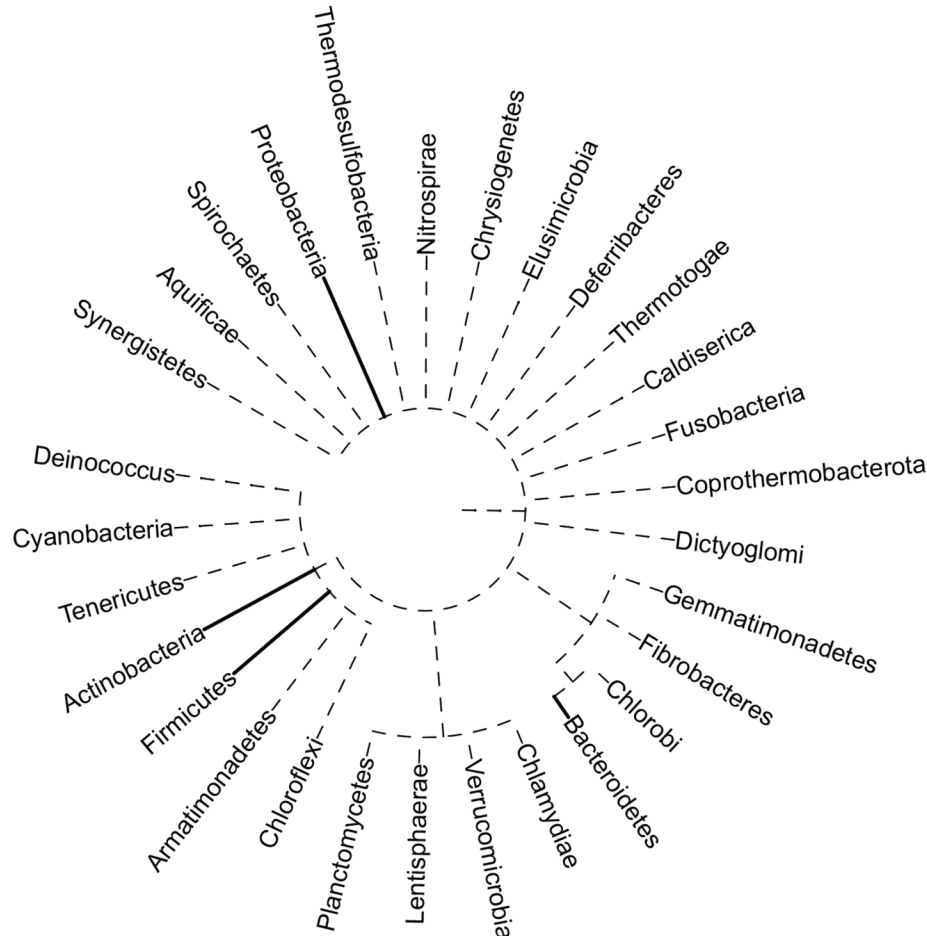

**Actinobacteria:**

*Arthrobacter* sp.

*Leifsonia* sp.

**Bacteroidetes:**

*Chryseobacterium* sp.

*Flavobacterium* sp.

**Firmicutes:**

*Bacillus flexus*

*Paenibacillus* sp.

**α-Proteobacteria:**

*Agrobacterium rhizogenes*

*Brevundimonas* sp.

**β-Proteobacteria:**

*Ralstonia* sp.

**γ-Proteobacteria:**

*Acinetobacter* sp. 01

*Acinetobacter* sp. 02

# Supplemental Figure 2

*Chryseobacterium* sp.

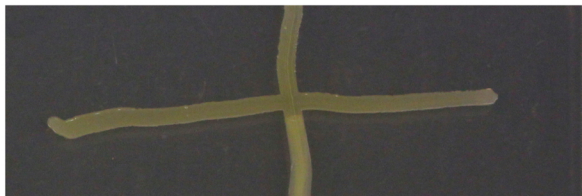

*A. rhizogenes*

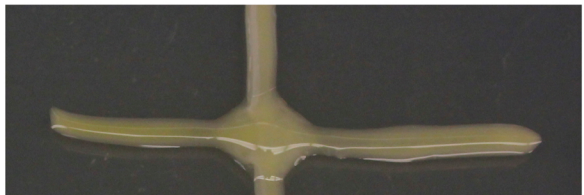

*Arthrobacter* sp.

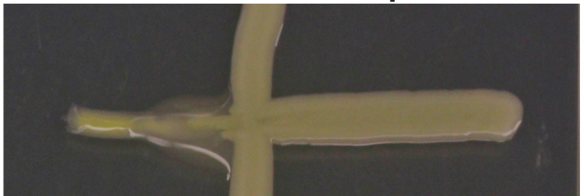

*Chryseobacterium* sp.

***A. rhizogenes***

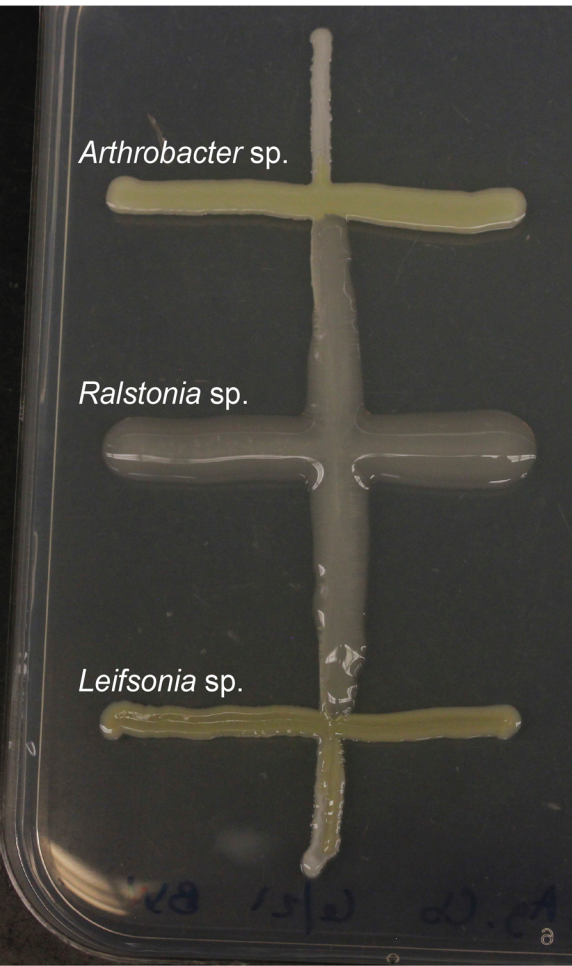

***Chryseobacterium* sp.**

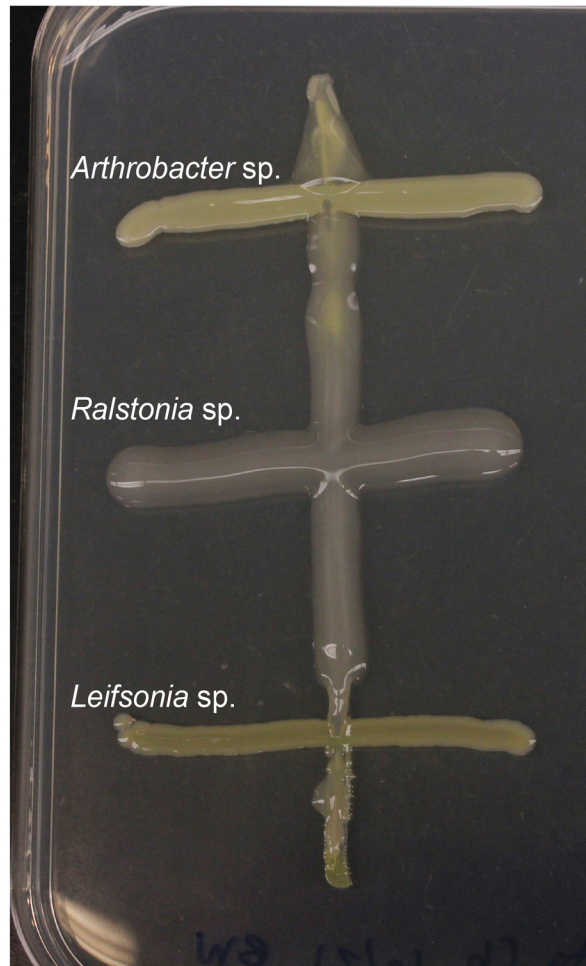

## Supplemental Figure 4

*P. putida* KT2440 grown in:

Control Media

Liquid Spent *An02* Media

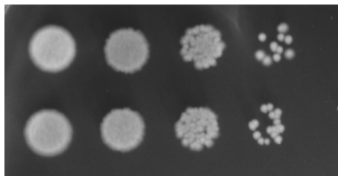

LB

# Supplemental Figure 5

LB

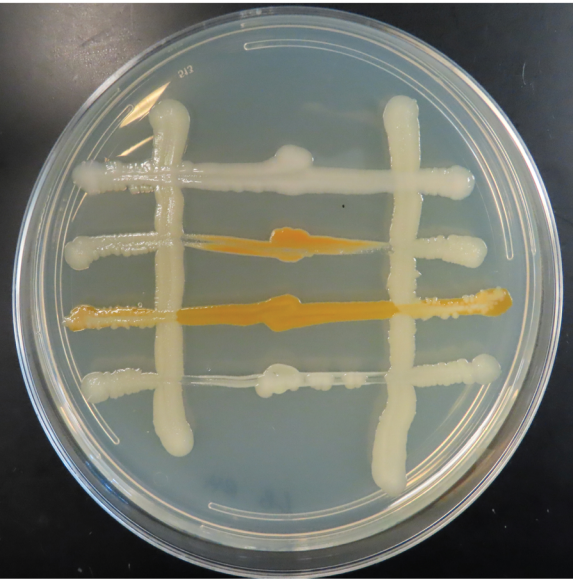

LB + 1  $\mu$ M FeCl<sub>3</sub>

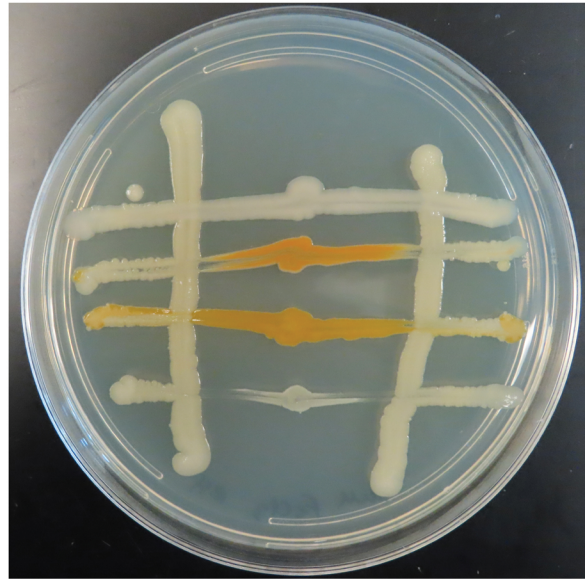

LB + 10  $\mu$ M FeCl<sub>3</sub>

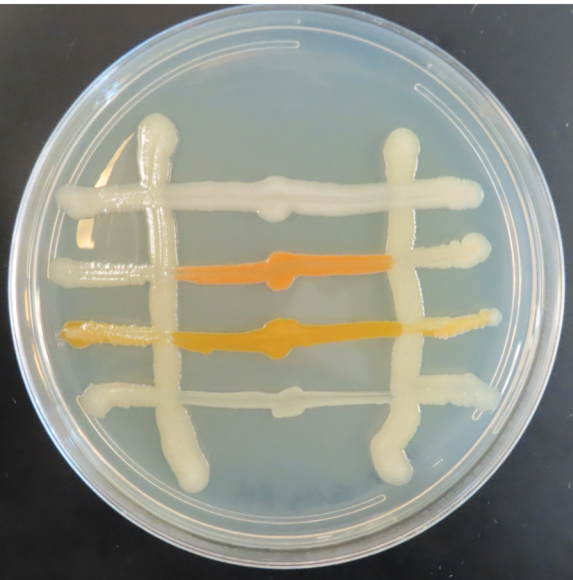

LB + 100  $\mu$ M FeCl<sub>3</sub>

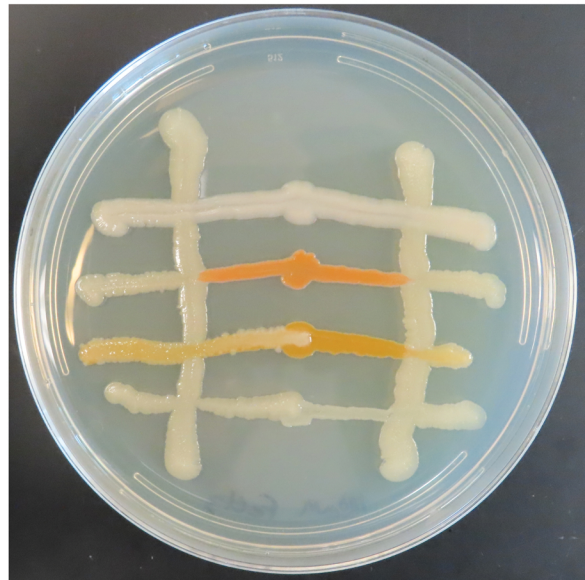

Supplement: Data_Sheet_2.pdf [file Data_Sheet_2.pdf]
