# Supplementary material for: Iron Supplementation Eliminates Antagonistic Interactions Between Root-Associated Bacteria
Source: Front Microbiol. 2020 Jul 22;11:1742. doi: 10.3389/fmicb.2020.01742 (PMC7387576; doi:10.3389/fmicb.2020.01742)
Supplement: TABLE S1 — Summary of potential secondary metabolites produced by microbes used in this study as identified by antiSMASH. [file Table_1.xlsx]

## Sheet: Sheet1
Microbe Name	JGI TaxonID	Identified Secondary Metabolite
Acinetobacter sp. 01	2593339129	lactone (x2), NRPS, arylpolyene, siderophore, bacteriocin
Acinetobacter sp. 02	2643221500	Siderophore, betalactone, terpene, ectoine
Agrobacterium rhizogenes	2521172625	phosphonate, terpene (x2), arylpolene (x3), NRPS (x4)
Arthrobacter sp.	2517572124	type III PKS, lassopeptide, terpene, siderophore (streptomycin-like), NRPS, betalactone
Bacillus flexus	2522125133	terpene (x3), type III PKS, siderophore
Brevundimonas sp.	2596583649	terpene, bacteriocin
Chryseobacterium sp.	2529292577	type I PKS, terpene, microviridin, siderophore, bacteriocin, NRPS, arylpolyene (x2)
Flavobacterium sp.	2563366720	arylpolyene (resorcinol), type III PKS, betalactone, siderophore, terpene (x2) NRPS
Leifsonia sp.	2522572063	type III PKS, NRPS-like (chlorizidine A)
Paenibacillus sp.	2563366513	NRPS (x12), lanthipeptide, lassopeptide, bacteriocin, PKS (x3), siderophore
Ralstonia sp.	2558309150	siderophore, arylpolyene, betalactone, bacterioicin, terpene
Data summarized from analysis of microbial genomes using antiSMASH v3.0: https://antismash.secondarymetabolites.org/#!/about
doi: 10.1093/nar/gkv437
Abbreviations. PKS: polyketide synthase. NRPS: non-ribosomal peptide synthase. LAP: Linear azol(in)e-containing peptide(s).
